# Supplementary material for: Multistimuli-responsive multicolor solid-state luminescence tuned by NH-dependent switchable hydrogen bonds
Source: Royal Society of Chemistry journal article supplement (doi:10.1039/d3dt03124a), 2023-11-23
Supplement: d3dt03124a1.pdf [file d3dt03124a1.pdf]

# Electronic Supplementary Information (ESI)

## Multistimuli-responsive multicolor solid-state luminescence tuned by NH-dependent switchable hydrogen bonds

Rui Zhang,<sup>‡a</sup> Li-Hua He,<sup>‡a</sup> Sui-Jun Liu,<sup>a</sup> Jin-Sheng Liao,<sup>a</sup> He-Rui Wen,<sup>a</sup> Jing-Lin Chen,<sup>\*a,b</sup> and  
Feng Zhao<sup>\*c</sup>

<sup>a</sup> *Jiangxi Provincial Key Laboratory of Functional Molecular Materials Chemistry, School of Chemistry and Chemical Engineering, Jiangxi University of Science and Technology, Ganzhou 341000, People's Republic of China*

<sup>b</sup> *State Key Laboratory of Structural Chemistry, Fujian Institute of Research on the Structure of Matter, Chinese Academy of Sciences, Fuzhou 350002, People's Republic of China*

<sup>c</sup> *School of Chemistry and Chemical Engineering, Jiangxi Science and Technology Normal University, Nanchang 330013, P.R. China*

## EXPERIMENTAL SECTION

**General Procedures and Materials.** All reactions were performed under an N<sub>2</sub> atmosphere using solvents treated with an appropriate drying reagent. Commercially available reagents were used without further purification unless otherwise stated. 5-*Tert*-butyl-3-(2'-pyrimidinyl)-1*H*-1,2,4-triazole (bpmtzH) was synthesized according to the literature methods.<sup>1</sup>

**Crystal Structural Determination.** Crystal data were determined on a Bruker D8 QUEST diffractometer with a graphite-monochromated Mo K $\alpha$  radiation (0.71073 Å). Structures were solved by direct method and refined by full-matrix least-squares technique on  $F^2$  using the *SHELXTL* and *Olex2* packages.<sup>2-4</sup> All non-hydrogen atoms were anisotropically refined, while hydrogen atoms were theoretically generated with isotropic thermal parameters.

**Physical Measurements.** <sup>1</sup>H NMR spectra were measured on Bruker Avance III NMR spectrometer. Infrared spectra were recorded on a Bruker Optics ALPHA FT-IR spectrometer using KBr pellets. Powder X-ray diffraction (PXRD) analyses were carried out on an Empyrean (PANalytical B.V.) diffractometer for a Cu-target tube and a graphite monochromator. Simulation of the PXRD patterns was performed by using single-crystal structure data and diffraction-crystal module of the Mercury (Hg) program version 3.0 available free of charge via the Internet at <http://www.iucr.org>. Thermogravimetric analysis (TGA) was performed on a PerkinElmer Pyris Diamond TG/DTA 6300 instrument under a nitrogen gas atmosphere at a heating rate of 10 °C min<sup>-1</sup>. Solid-state luminescence properties were recorded on an Edinburgh F900 fluorescence spectrometer with a thermoelectrically cooled Hamamatsu R3809 photomultiplier tube. Solid-state emission quantum yield was measured by using an integrating sphere. The radiative decay rate constant  $k_r$  and non-radiative decay rate constant  $k_{nr}$  were calculated by  $k_r = \Phi/\tau$  and  $k_{nr} = (1-\Phi)/\tau$ , respectively.<sup>5,6</sup>

**Computational Methodology.** The excited triplet state ( $T_1$ ) geometries of **1c**, **1d**, and *ground 1d* were optimized by using the B3LYP functional<sup>7,8</sup> with 6-31G(d) basis set<sup>9</sup> for H, C, N, F, and P and LANL2DZ basis set<sup>10</sup> for Cu. The lowest-lying vertical excitation energies ( $S_0 \rightarrow T_1$ ) were calculated by time-dependent density functional theory (TDDFT) calculations<sup>11,12</sup> of the closed-shell state at the optimized  $T_1$  state geometries using the M06-2X functional<sup>13</sup> with the same basis sets. All calculations were performed by using the Gaussian 16<sup>14</sup> in the gas phase. The electronic density plots for the frontier molecular orbitals were obtained by using Multiwfn 3.8 analyzer soft<sup>15</sup> and VMD program<sup>16</sup>.

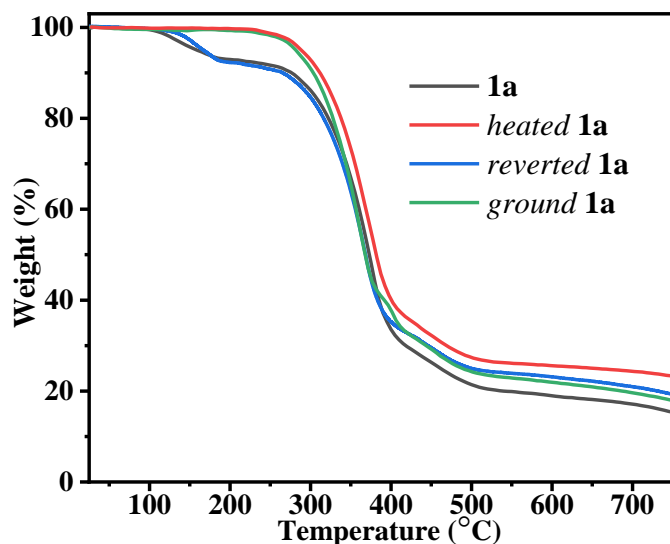

Fig. S1 TGA curves of **1a** in different solid states.

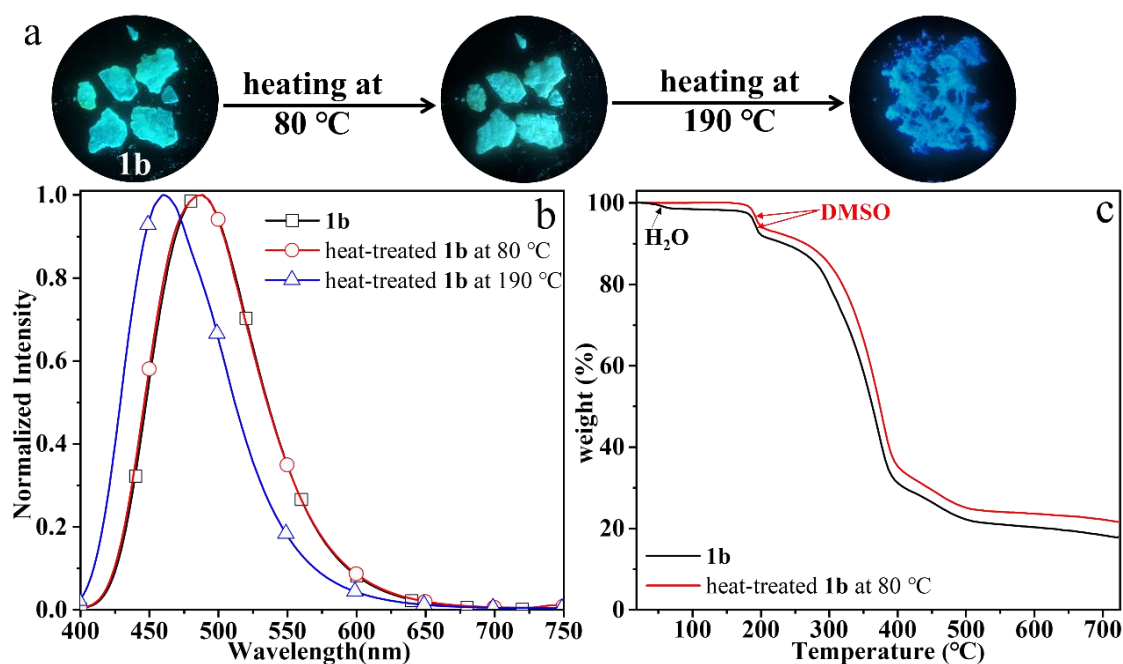

Fig. S2 Photographic images (a), emission spectra (b), and TGA curves (c) of **1b** in different solid states.

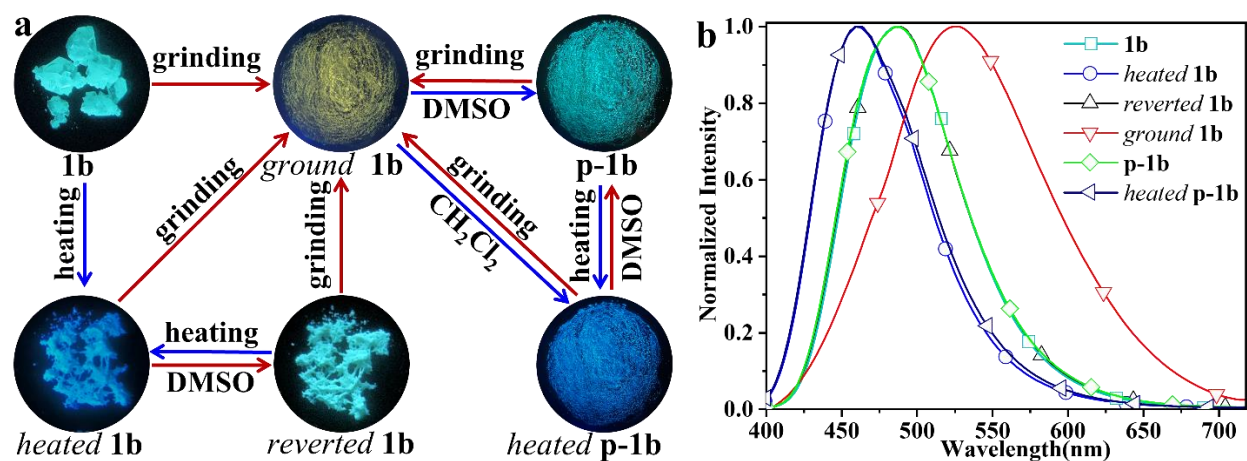

Fig. S3 Photographic images (a) and emission spectra (b) of **1b** in different solid states.

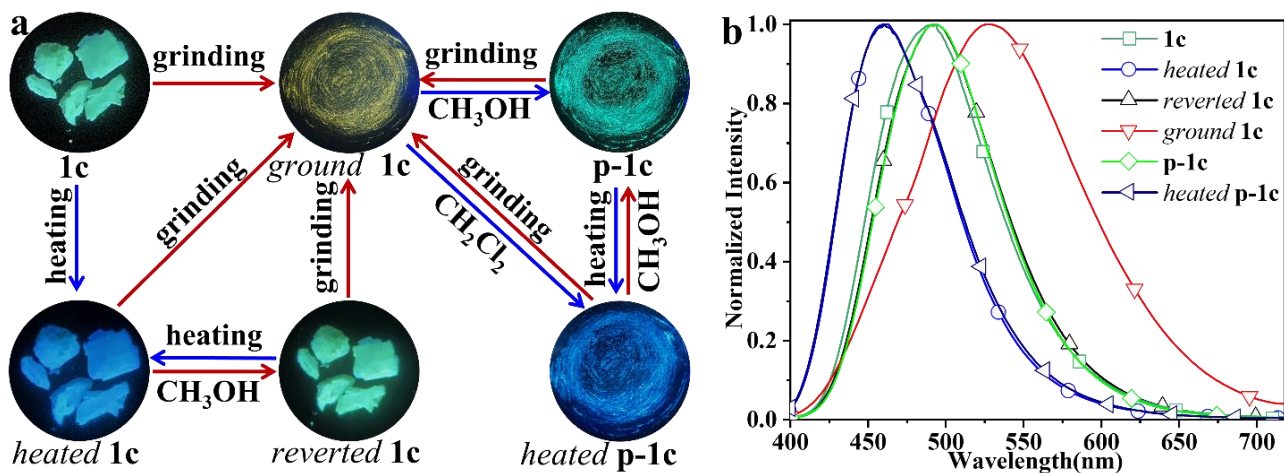

Fig. S4 Photographic images (a) and emission spectra (b) of **1c** in different solid states.

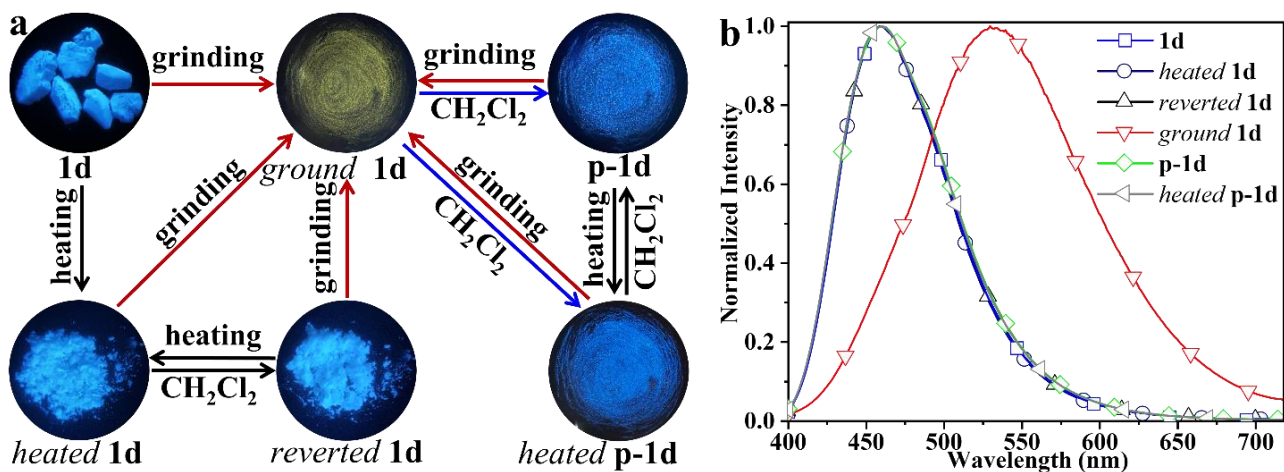

Fig. S5 Photographic images (a) and emission spectra (b) of **1d** in different solid states.

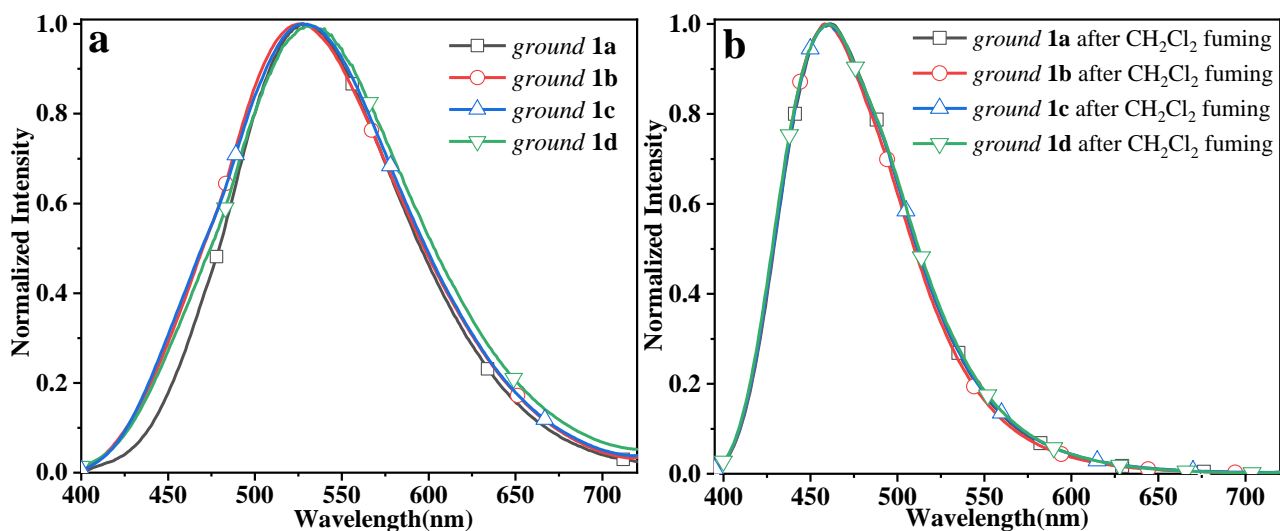

Fig. S6 Emission spectra of ground **1a–1d** (a) and *ground 1a–1d* after CH<sub>2</sub>Cl<sub>2</sub> fuming (b).

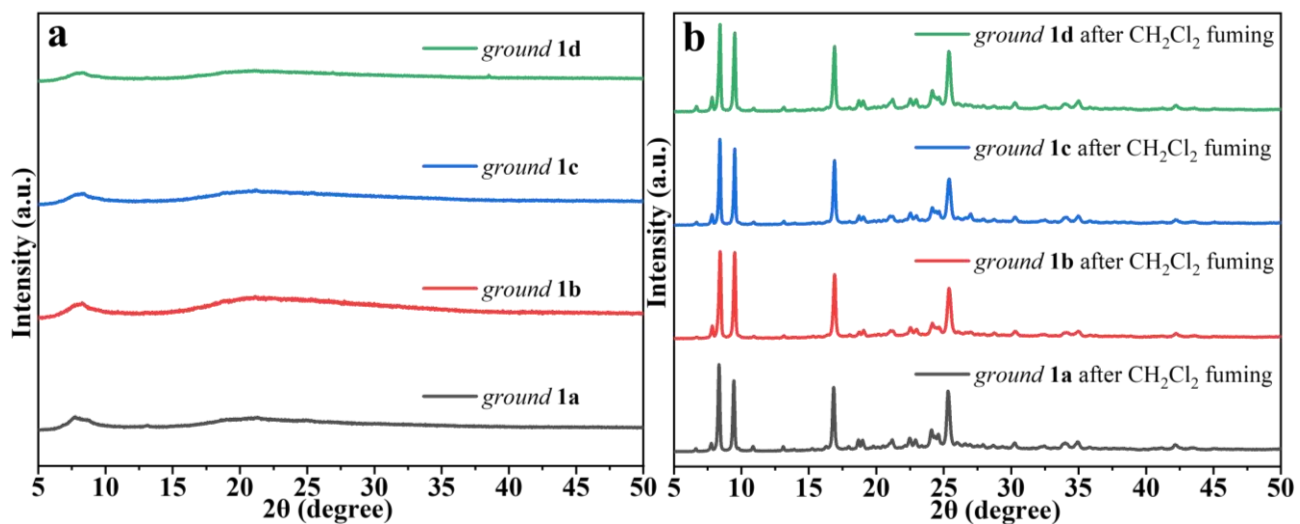

Fig. S7 PXRD patterns of **ground 1a–1d** before (a) and after (b)  $\text{CH}_2\text{Cl}_2$  fuming.

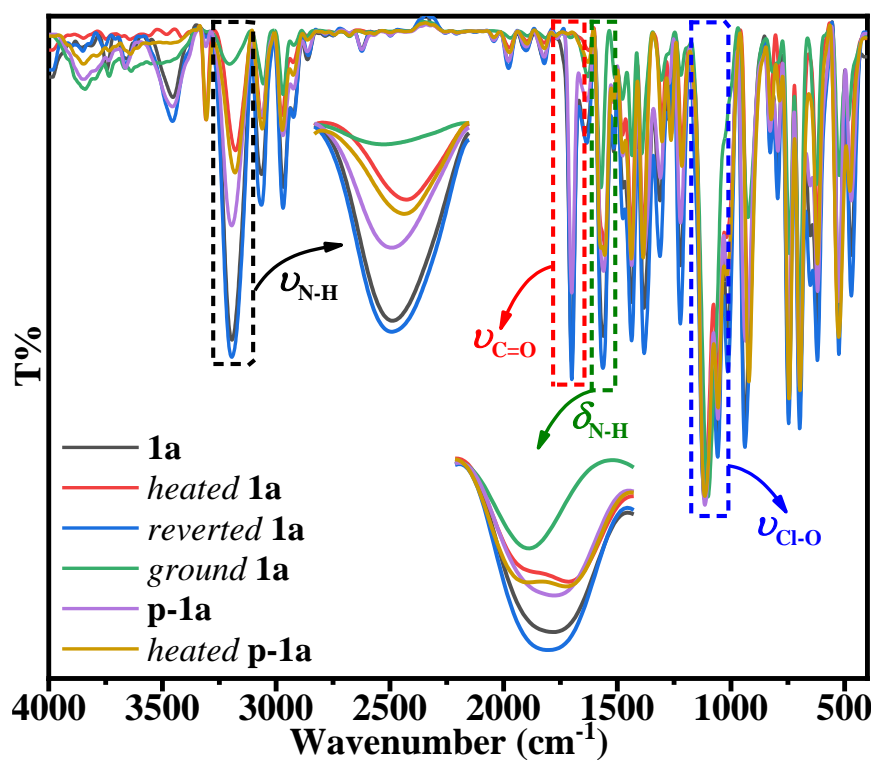

Fig. S8 FT-IR spectra of **1a** in different solid states.

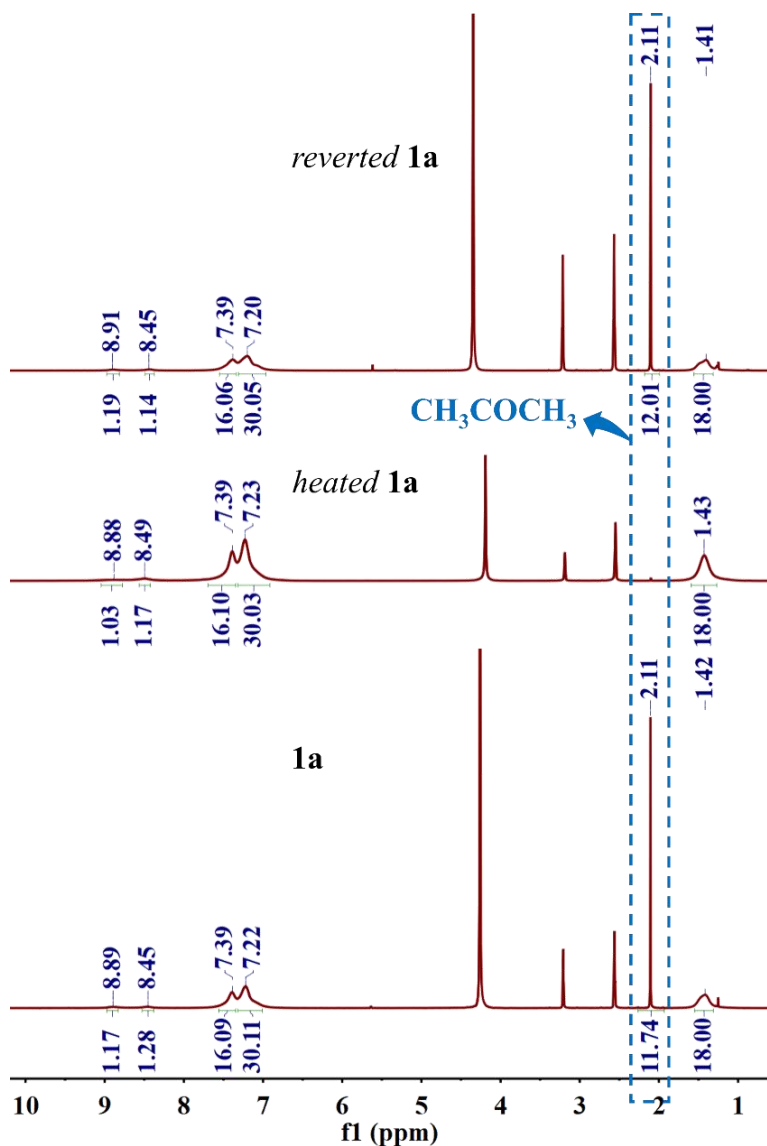

Fig. S9  $^1\text{H}$  NMR spectra of **1a**, heated **1a**, and reverted **1a** in  $\text{CD}_3\text{OD}/\text{DMSO}-d_6$  (1:1 v/v).

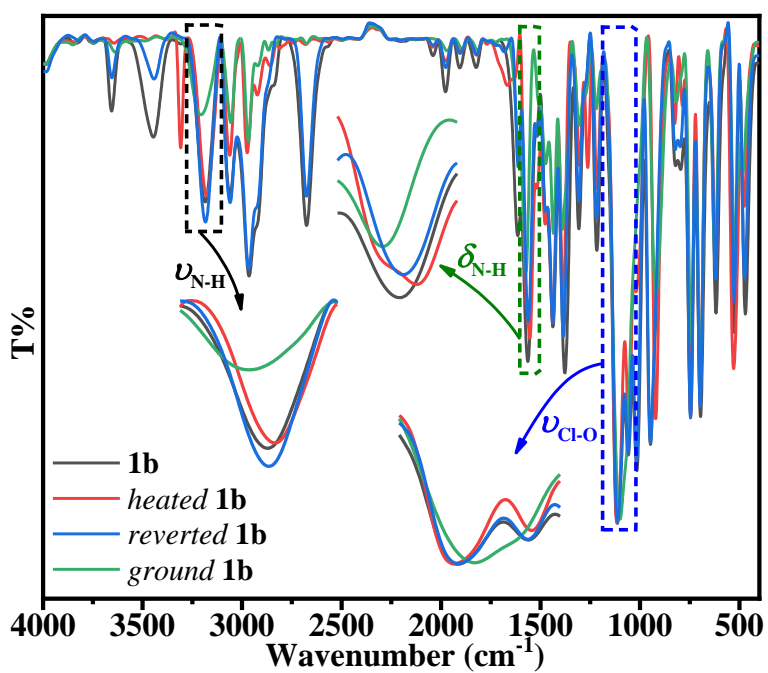

Fig. S10 FT-IR spectra of **1b** in different solid states.

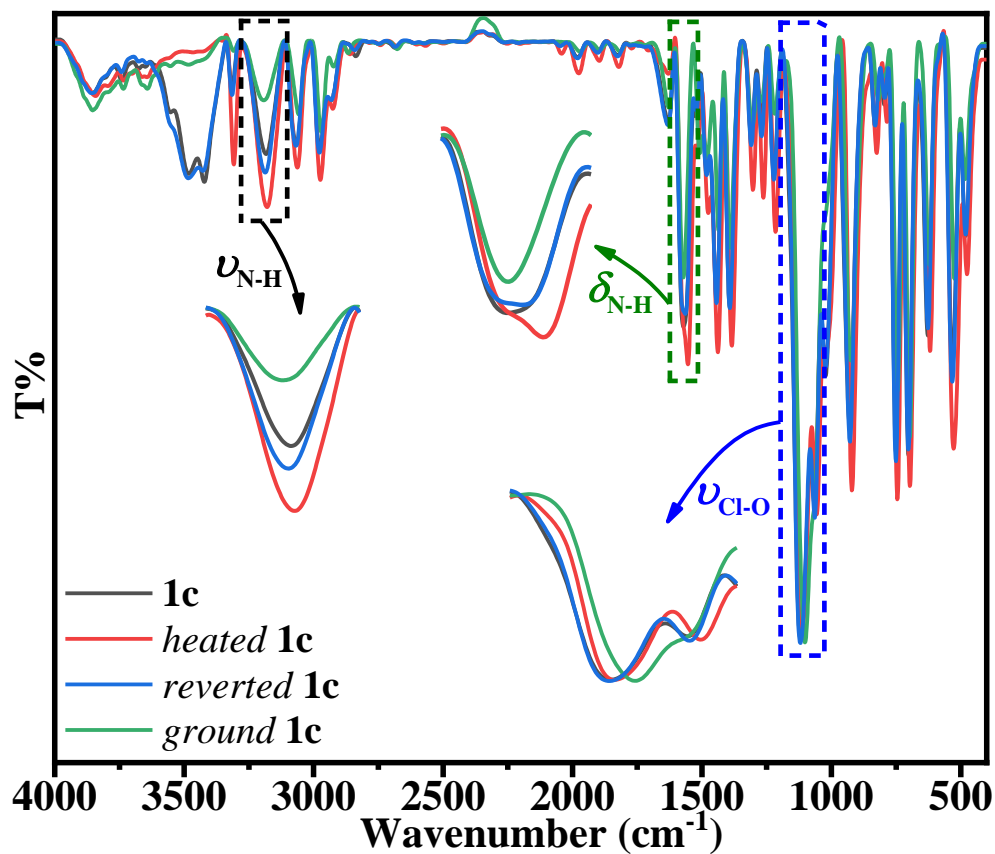

Fig. S11 FT-IR spectra of **1c** in different solid states.

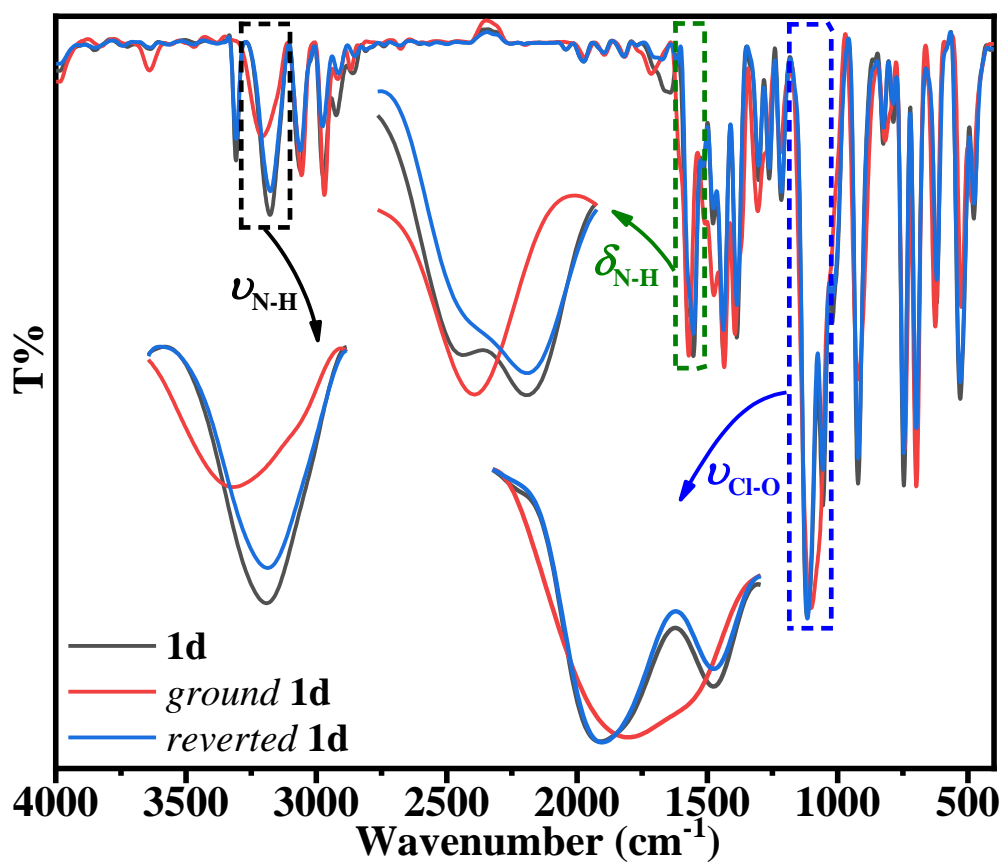

Fig. S12 FT-IR spectra of **1d** in different solid states.



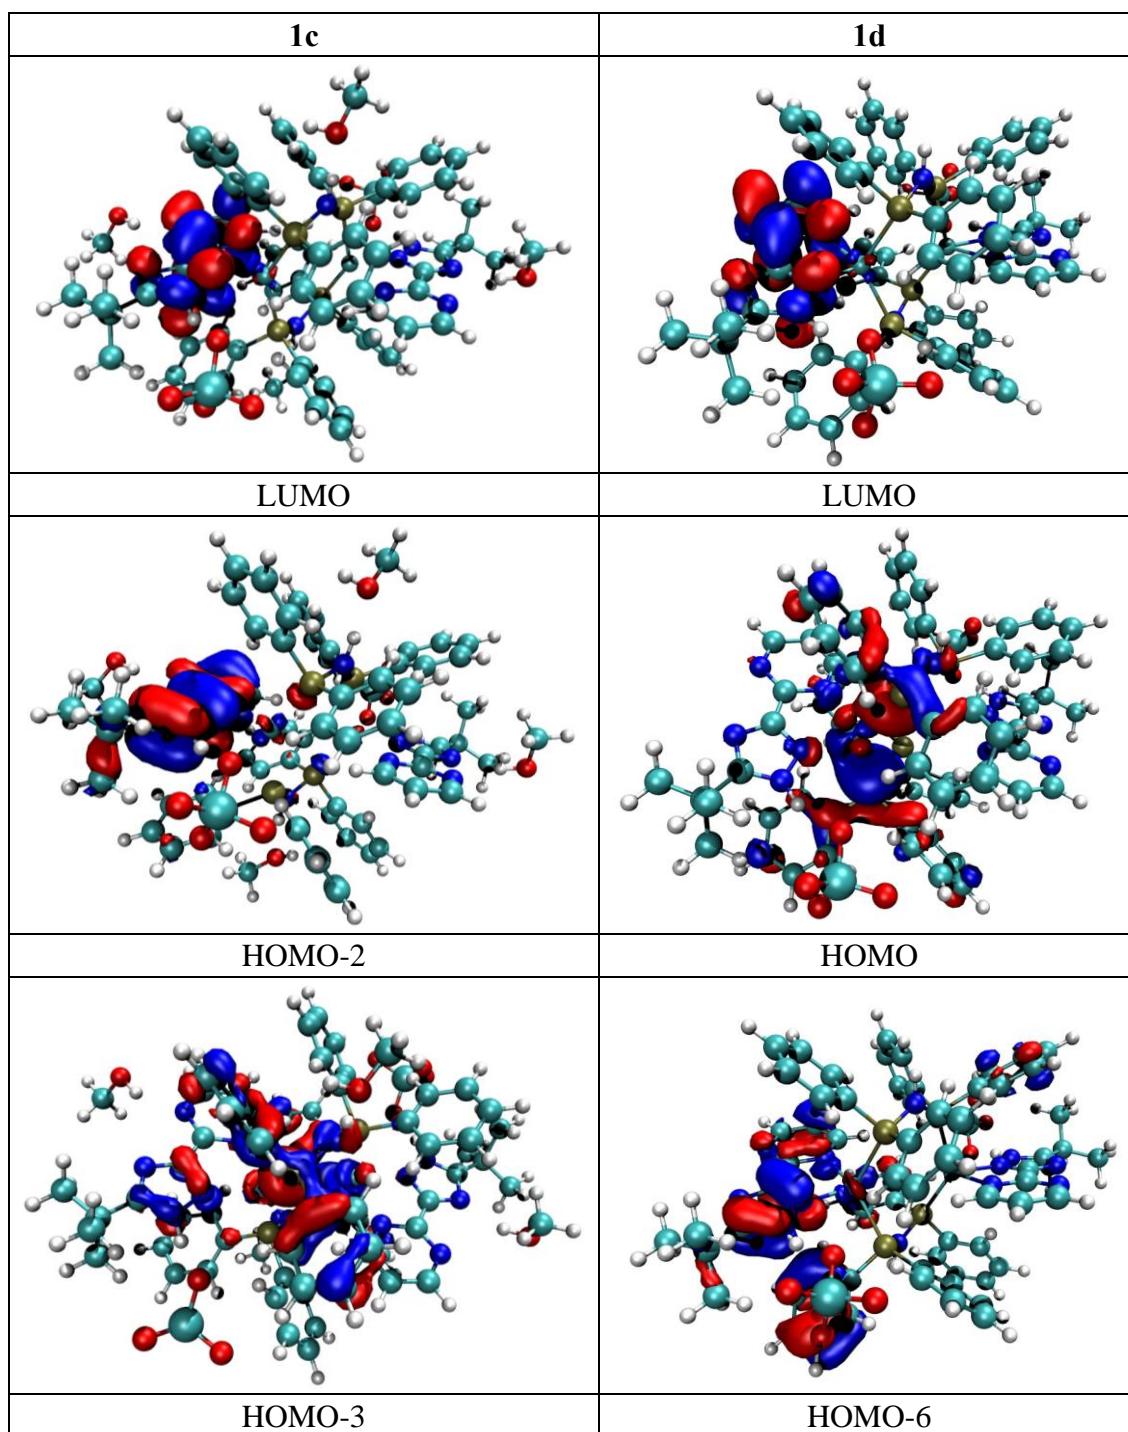

**Fig. S13** Plots of the frontier molecular orbitals involved in the emissions of **1c** and **1d** by TDDFT method at the M062X level.

**Table S1** Crystal data and structure refinement parameters of **1a–1d**.

| compound                                           | <b>1a</b>                                                                                                      | <b>1b</b>                                                                                                                     | <b>1c</b>                                                                                                      | <b>1d</b>                                                                                                      |
|----------------------------------------------------|----------------------------------------------------------------------------------------------------------------|-------------------------------------------------------------------------------------------------------------------------------|----------------------------------------------------------------------------------------------------------------|----------------------------------------------------------------------------------------------------------------|
| formula                                            | C <sub>74</sub> H <sub>84</sub> Cl <sub>2</sub> Cu <sub>2</sub> N <sub>12</sub> O <sub>12</sub> P <sub>4</sub> | C <sub>72</sub> H <sub>84</sub> Cl <sub>2</sub> Cu <sub>2</sub> N <sub>12</sub> O <sub>12</sub> P <sub>4</sub> S <sub>2</sub> | C <sub>72</sub> H <sub>84</sub> Cl <sub>2</sub> Cu <sub>2</sub> N <sub>12</sub> O <sub>12</sub> P <sub>4</sub> | C <sub>72</sub> H <sub>76</sub> Cl <sub>10</sub> Cu <sub>2</sub> N <sub>12</sub> O <sub>8</sub> P <sub>4</sub> |
| fw                                                 | 1655.39                                                                                                        | 1695.567                                                                                                                      | 1631.37                                                                                                        | 1842.994                                                                                                       |
| <i>T</i> (K)                                       | 297.46(15)                                                                                                     | 293.0                                                                                                                         | 293.0                                                                                                          | 297.0                                                                                                          |
| crystal system                                     | Triclinic                                                                                                      | Triclinic                                                                                                                     | Monoclinic                                                                                                     | Triclinic                                                                                                      |
| space group                                        | <i>P</i> $\bar{1}$                                                                                             | <i>P</i> $\bar{1}$                                                                                                            | <i>P</i> 2 <sub>1</sub> /n                                                                                     | <i>P</i> $\bar{1}$                                                                                             |
| <i>a</i> (Å)                                       | 12.8443(3)                                                                                                     | 12.8780(8)                                                                                                                    | 13.8862(14)                                                                                                    | 10.9861(5)                                                                                                     |
| <i>b</i> (Å)                                       | 13.3701(3)                                                                                                     | 13.4796(8)                                                                                                                    | 14.7620(15)                                                                                                    | 13.9800(6)                                                                                                     |
| <i>c</i> (Å)                                       | 13.9219(3)                                                                                                     | 13.8931(8)                                                                                                                    | 20.0850(2)                                                                                                     | 16.0424(7)                                                                                                     |
| $\alpha$ (deg)                                     | 72.490(2)                                                                                                      | 72.881(2)                                                                                                                     | 90.000                                                                                                         | 99.272(4)                                                                                                      |
| $\beta$ (deg)                                      | 67.577(2)                                                                                                      | 65.962(2)                                                                                                                     | 104.392(3)                                                                                                     | 105.477(4)                                                                                                     |
| $\gamma$ (deg)                                     | 67.012(2)                                                                                                      | 67.540(2)                                                                                                                     | 90.000                                                                                                         | 96.117(4)                                                                                                      |
| <i>V</i> (Å <sup>3</sup> )                         | 2001.86(9)                                                                                                     | 2007.8(2)                                                                                                                     | 3987.9(7)                                                                                                      | 2314.36(19)                                                                                                    |
| <i>Z</i>                                           | 1                                                                                                              | 1                                                                                                                             | 2                                                                                                              | 1                                                                                                              |
| $\rho_{\text{calc}}$ (g cm <sup>-3</sup> )         | 1.373                                                                                                          | 1.402                                                                                                                         | 1.359                                                                                                          | 1.322                                                                                                          |
| $\mu$ (mm <sup>-1</sup> )                          | 0.744                                                                                                          | 0.793                                                                                                                         | 0.745                                                                                                          | 0.871                                                                                                          |
| no. reflections collected                          | 58231                                                                                                          | 30235                                                                                                                         | 60587                                                                                                          | 26563                                                                                                          |
| no. unique reflections                             | 9157                                                                                                           | 9183                                                                                                                          | 9222                                                                                                           | 8082                                                                                                           |
| <i>R</i> <sub>int</sub>                            | 0.0529                                                                                                         | 0.0284                                                                                                                        | 0.0474                                                                                                         | 0.0700                                                                                                         |
| no. observed reflections                           | 9157                                                                                                           | 9183                                                                                                                          | 9222                                                                                                           | 8082                                                                                                           |
| no. parameters                                     | 588                                                                                                            | 514                                                                                                                           | 475                                                                                                            | 548                                                                                                            |
| GOF on <i>F</i> <sup>2</sup>                       | 1.056                                                                                                          | 1.058                                                                                                                         | 1.083                                                                                                          | 1.059                                                                                                          |
| <i>R</i> <sub>1</sub> [ <i>I</i> > 2σ( <i>I</i> )] | 0.0418                                                                                                         | 0.0422                                                                                                                        | 0.0601                                                                                                         | 0.0876                                                                                                         |
| <i>wR</i> <sub>2</sub>                             | 0.1362                                                                                                         | 0.1206                                                                                                                        | 0.1928                                                                                                         | 0.2737                                                                                                         |

**Table S2** Selected bond lengths (Å) and angles (deg) of **1a–1d**.

| compound   | <b>1a</b>  | <b>1b</b>  | <b>1c</b>  | <b>1d</b>  |
|------------|------------|------------|------------|------------|
| Cu1–N1     | 2.1217(17) | 2.1184(19) | 2.118(3)   | 2.127(4)   |
| Cu1–N2     | 2.2053(17) | 2.2140(2)  | 2.2330(3)  | 2.229(4)   |
| Cu1–P1     | 2.2527(5)  | 2.2539(6)  | 2.2559(10) | 2.2574(13) |
| Cu1–P2     | 2.2582(5)  | 2.2474(6)  | 2.2588(10) | 2.2597(13) |
| Cu1...Cu1# | 3.3176(3)  | 3.2931(4)  | 3.2896(7)  | 3.2818(7)  |
| N1–Cu1–N2  | 76.61(7)   | 76.49(7)   | 76.51(11)  | 76.73(14)  |
| N1–Cu1–P1  | 108.43(5)  | 104.79(6)  | 107.73(9)  | 107.70(11) |
| N1–Cu1–P2  | 105.16(5)  | 108.83(6)  | 106.69(9)  | 107.58(11) |
| N2–Cu1–P1  | 100.28(5)  | 99.95(6)   | 98.91(9)   | 99.98(11)  |
| N2–Cu1–P2  | 99.95(5)   | 100.08(6)  | 100.21(9)  | 99.11(12)  |
| P1–Cu1–P2  | 143.91(2)  | 143.99(2)  | 143.61(4)  | 142.82(5)  |

**Table S3** Photoluminescence data of **1a** in different solid states.

| state              | $\lambda_{em}$ [nm] | $\tau$ [ $\mu$ s] | $\Phi_{em}$ [%] | $k_r$ [ $s^{-1}$ ] | $k_{nr}$ [ $s^{-1}$ ] |
|--------------------|---------------------|-------------------|-----------------|--------------------|-----------------------|
| <b>1a</b>          | 480                 | 10                | 84              | $8.4 \times 10^4$  | $1.6 \times 10^4$     |
| <i>heated 1a</i>   | 459                 | 50                | 81              | $1.6 \times 10^4$  | $3.8 \times 10^3$     |
| <i>reverted 1a</i> | 483                 | 10                | 82              | $8.2 \times 10^4$  | $1.8 \times 10^4$     |
| <i>ground 1a</i>   | 527                 | 32                | 2.4             | $7.5 \times 10^2$  | $3.1 \times 10^4$     |
| <b>p-1a</b>        | 483                 | 10                | 82              | $8.2 \times 10^4$  | $1.8 \times 10^4$     |
| <i>heated p-1a</i> | 459                 | 50                | 80              | $1.6 \times 10^4$  | $4.0 \times 10^3$     |

**Table S4** Partial molecular orbital compositions (%) of the frontier orbitals involved in the emissive states for **1c** calculated by TDDFT method at the M062X level.

| Orbital | Bond Type               | MO Contribution (%) |      |        |
|---------|-------------------------|---------------------|------|--------|
|         |                         | Cu                  | dppa | bmptzH |
| LUMO    | $\pi^*(bmptzH)$         | 2.45                | 6.38 | 90.9   |
| HOMO-2  | $\pi(bmptzH)+\pi(dppa)$ | 5.15                | 16.6 | 78.1   |
| HOMO-3  | $\pi(dppa)+d(Cu)$       | 16.7                | 68.6 | 14.0   |

**Table S5** Calculated emission energies and orbital transition analyses of **1c**, **1d**, and *ground 1d* from TDDFT calculations with M062X functional at the  $T_1$  geometry.

| Compound         | $E$ , nm (eV) | Transition (Contribution) | Assignment             | Measured |
|------------------|---------------|---------------------------|------------------------|----------|
| <b>1c</b>        | 496 (2.50)    | HOMO-2→LUMO (78.0%)       | $^3MLCT/^3LLCT/^3ILCT$ | 494      |
|                  |               | HOMO-3→LUMO (11.7%)       |                        |          |
| <b>1d</b>        | 403 (3.07)    | HOMO→LUMO (31.7%)         | $^3MLCT/^3LLCT/^3ILCT$ | 459      |
|                  |               | HOMO-6→LUMO (21.3%)       |                        |          |
| <i>ground 1d</i> | 422 (2.93)    | HOMO→LUMO (68.9%)         | $^3MLCT/^3LLCT$        | 527      |

**Table S6** Partial molecular orbital compositions (%) of the frontier orbitals involved in the emissive states for **1d** calculated by TDDFT method at the M062X level.

| Orbital | Bond Type                             | MO Contribution (%) |      |        |
|---------|---------------------------------------|---------------------|------|--------|
|         |                                       | Cu                  | dppa | bmptzH |
| LUMO    | $\pi^*(\text{bmptzH})$                | 6.36                | 7.17 | 86.4   |
| HOMO    | $\pi(\text{dppa})+d(\text{Cu})$       | 18.6                | 74.5 | 6.89   |
| HOMO-6  | $\pi(\text{dppa})+\pi(\text{bmptzH})$ | 6.97                | 46.3 | 45.8   |

**Table S7** Partial molecular orbital compositions (%) of the frontier orbitals involved in the emissive states for *ground* **1d** calculated by TDDFT method at the M062X level.

| Orbital | Bond Type                       | MO Contribution (%) |      |        |
|---------|---------------------------------|---------------------|------|--------|
|         |                                 | Cu                  | dppa | bmptzH |
| LUMO    | $\pi^*(\text{bmptzH})$          | 6.68                | 8.40 | 84.8   |
| HOMO    | $\pi(\text{dppa})+d(\text{Cu})$ | 19.7                | 71.8 | 8.41   |

## REFERENCES

- (1) S. Kubota, M. Uda, T. Nakagawa, 1,2,4-Triazoles. V. Nuclear magnetic resonance study of N-methyl derivatives of 1,2,4-triazoles, *J. Heterocycl. Chem.*, 1975, **12**, 855–860.
- (2) G. Sheldrick, A short history of *SHELX*, *Acta Cryst. Sect. A*, 2008, **A64**, 112–122.
- (3) G. Sheldrick, SHELXT: Integrating space group determination and structure solution, *Acta Cryst. Sect. A*, 2014, **70**, C1437.
- (4) H. Puschmann, L. J. Bourhis, O. V. Dolomanov, R. J. Gildea, J. A. K. Howard, OLEX2 – a complete package for molecular crystallography, *Acta Cryst. Sect. A*, 2011, **67**, C593.
- (5) X. Gu, J. Yao, G. Zhang, Y. Yan, C. Zhang, Q. Peng, Q. Liao, Y. Wu, Z. Xu, Y. Zhao, H. Fu, D. Zhang, Polymorphism-Dependent Emission for Di(p-methoxyphenyl)dibenzofulvene and Analogues: Optical Waveguide/Amplified Spontaneous Emission Behaviors, *Adv. Funct. Mater.*, 2012, **22**, 4862–4872.
- (6) Z. Xiong, Y. Li, J. Liang, S. Xiang, Y. Lv, Z. Zhang, Coordination-Guided Conformational Locking of 1D Metal–Organic Frameworks for a Tunable Stimuli-Responsive Luminescence Region, *ACS Appl. Mater. Interfaces*, 2022, **14**, 38098–38104.
- (7) Becke, A. D. Density-functional thermochemistry. III. The role of exact exchange. *J. Chem. Phys.* **1993**, *98*, 5648–5652.
- (8) Runge, E.; Gross, E. K. U. Density-Functional Theory for Time-Dependent Systems. *Phys. Rev. Lett.* **1984**, *52*, 997–1000.
- (9) Francl, M. M.; Pietro, W. J.; Hehre, W. J.; Binkley, J. S.; Gordon, M. S.; DeFrees, D. J.; Pople, J. A. Self-consistent molecular orbital methods. XXIII. A polarization-type basis set for second-row elements. *J. Chem. Phys.* **1982**, *77*, 3654–3665.

- (10) Hay, P. J.; Wadt, W. R. Ab initio effective core potentials for molecular calculations. Potentials for K to Au including the outermost core orbitals. *J. Chem. Phys.* **1985**, *82*, 299–310.
- (11) Casida, M. E.; Jamorski, C.; Casida, K. C.; Salahub, D. R. Molecular Excitation Energies to High-lying Bound States from Time-dependent Density-functional Response Theory: Characterization and Correction of the Time-dependent Local Density Approximation Ionization Threshold. *J. Chem. Phys.* **1998**, *108*, 4439–4449.
- (12) Stratmann, R. E.; Scuseria, G. E.; Frisch, M. J. An Efficient Implementation of Time-dependent Density-functional Theory for the Calculation of Excitation Energies of Large Molecules. *J. Chem Phys.* **1998**, *109*, 8218–8224.
- (13) Zhao, Y.; Truhlar, D. G. The M06 suite of density functionals for main group thermochemistry, thermochemical kinetics, noncovalent interactions, excited states, and transition elements: two new functionals and systematic testing of four M06-class functionals and 12 other functionals. *Theor. Chem. Acc.* **2008**, *120*, 215–241.
- (14) Frisch, M. J.; Trucks, G. W.; Schlegel, H. B.; Scuseria, G. E.; Robb, M. A.; Cheeseman, J. R.; Scalmani, G.; Barone, V.; Petersson, G. A.; Nakatsuji, H.; Li, X.; Caricato, M.; Marenich, A. V.; Bloino, J.; Janesko, B. G.; Gomperts, R.; Mennucci, B.; Hratchian, H. P.; Ortiz, J. V.; Izmaylov, A. F.; Sonnenberg, J. L.; Williams-Young, D.; Ding, F.; Lipparini, F.; Egidi, F.; Goings, J.; Peng, B.; Petrone, A.; Henderson, T.; Ranasinghe, D.; Zakrzewski, V. G.; Gao, J.; Rega, N.; Zheng, G.; Liang, W.; Hada, M.; Ehara, M.; Toyota, K.; Fukuda, R.; Hasegawa, J.; Ishida, M.; Nakajima, T.; Honda, Y.; Kitao, O.; Nakai, H.; Vreven, T.; Throssell, K.; Montgomery, J. A., Jr.; Peralta, J. E.; Ogliaro, F.; Bearpark, M. J.; Heyd, J. J.; Brothers, E. N.; Kudin, K. N.; Staroverov, V. N.; Keith, T. A.; Kobayashi, R.; Normand, J.; Raghavachari, K.; Rendell, A. P.; Burant, J. C.; Iyengar, S. S.; Tomasi, J.; Cossi, M.; Millam, J. M.; Klene, M.; Adamo, C.; Cammi, R.; Ochterski, J. W.; Martin, R. L.; Morokuma, K.; Farkas, O.; Foresman, J. B.; Fox, D. J. *Gaussian 16, Revision A.03*; Gaussian, Inc.: Wallingford, CT, 2016.
- (15) Lu, T.; Chen, F. W. Multiwfn: A Multifunctional Wavefunction Analyzer. *J. Comp. Chem.* **2012**, *33*, 580–592.
- (16) Humphrey, W.; Dalke, A.; Schulten, K. VMD: Visual molecular dynamics. *J. Mol. Graph.* **1996**, *14*, 33–38.
